# Supplementary material for: Use of Human-Centered Design to Improve Implementation of Evidence-Based Psychotherapies in Low-Resource Communities: Protocol for Studies Applying a Framework to Assess Usability
Source: PubMed Central journal article supplement (PMC6819011; doi:10.2196/14990), 2019-10-09

**Multimedia Appendix 1**—Example CONSORT (Consolidated Standards of Reporting Trials) diagrams for provider and patient participants in the test phase of University of Washington’s Advanced Laboratories for Accelerating the Reach and Impact of Treatments for Youth and Adults with Mental Illness Center studies.

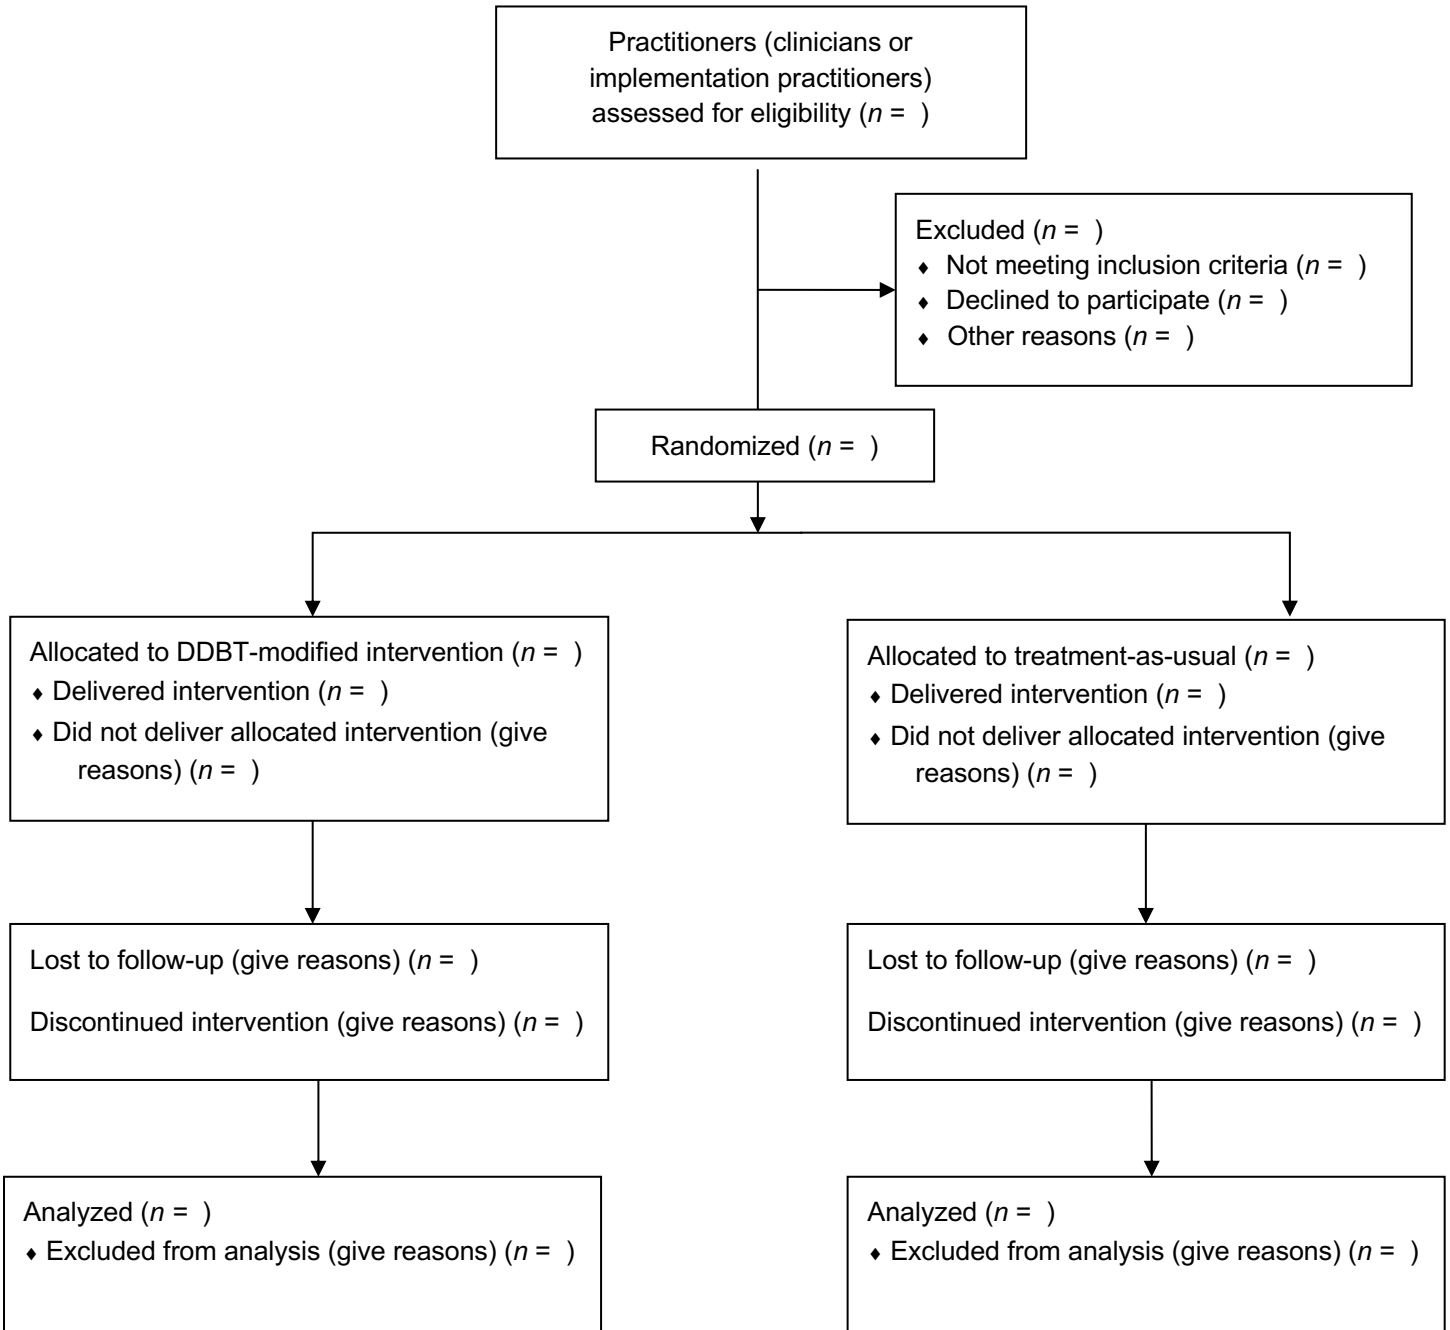

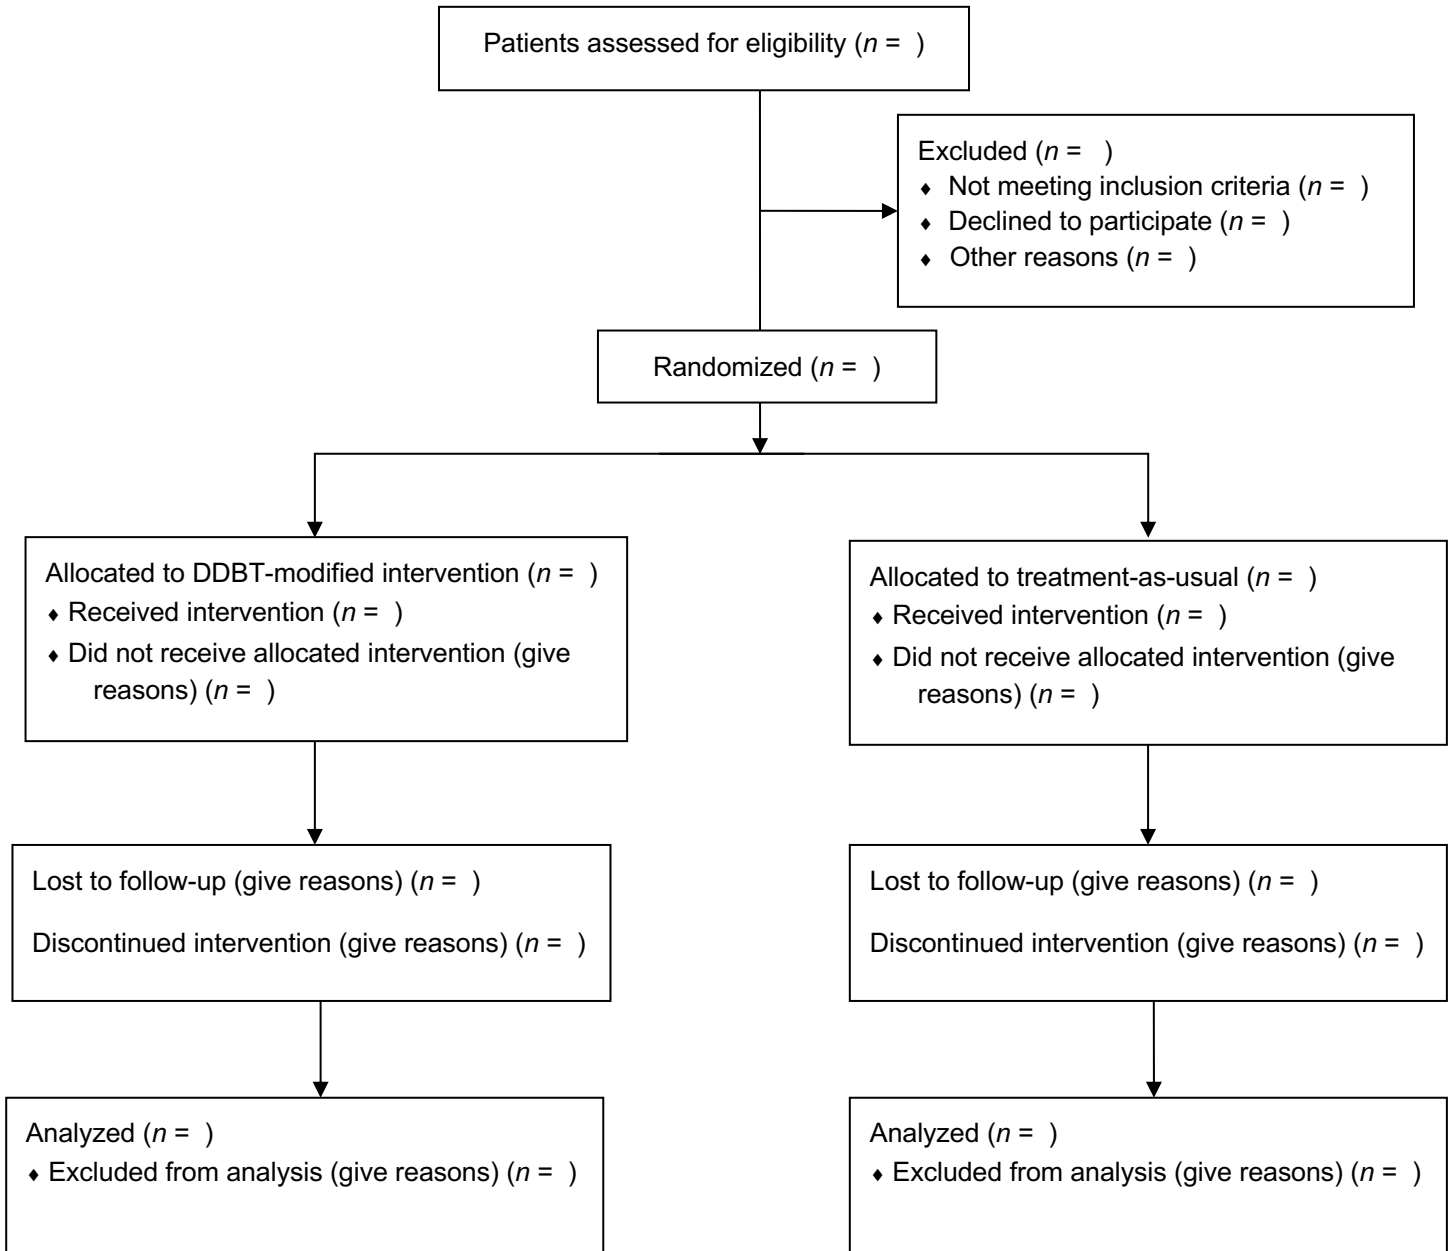

Supplement: resprot_v8i10e14990_app1.pdf [file resprot_v8i10e14990_app1.pdf]
