# Supplementary material for: Use of Human-Centered Design to Improve Implementation of Evidence-Based Psychotherapies in Low-Resource Communities: Protocol for Studies Applying a Framework to Assess Usability
Source: PubMed Central journal article supplement (PMC6819011; doi:10.2196/14990), 2019-10-09
Supplement: resprot_v8i10e14990_app4.pdf [file resprot_v8i10e14990_app4.pdf]

**Implementation Strategy Usability Scale (ISUS)**  
*(Adapted from the System Usability Scale)*

|                                                                                                       | Strongly<br>Disagree |   |   |   |   |  | Strongly<br>Agree |
|-------------------------------------------------------------------------------------------------------|----------------------|---|---|---|---|--|-------------------|
| 1. I think I would like to use [NAME OF STRATEGY] frequently                                          | 1                    | 2 | 3 | 4 | 5 |  |                   |
| 2. I found [NAME OF STRATEGY] unnecessarily complex                                                   | 1                    | 2 | 3 | 4 | 5 |  |                   |
| 3. I thought [NAME OF STRATEGY] was easy to use                                                       | 1                    | 2 | 3 | 4 | 5 |  |                   |
| 4. I think that I would need the support of an expert consultant to be able to use [NAME OF STRATEGY] | 1                    | 2 | 3 | 4 | 5 |  |                   |
| 5. I found the various components of [NAME OF STRATEGY] were well integrated                          | 1                    | 2 | 3 | 4 | 5 |  |                   |
| 6. I thought there was too much inconsistency in [NAME OF STRATEGY]                                   | 1                    | 2 | 3 | 4 | 5 |  |                   |
| 7. I would imagine that most people would learn to use [NAME OF STRATEGY] very quickly                | 1                    | 2 | 3 | 4 | 5 |  |                   |
| 8. I found [NAME OF STRATEGY] very cumbersome to use                                                  | 1                    | 2 | 3 | 4 | 5 |  |                   |
| 9. I felt very confident using [NAME OF STRATEGY]                                                     | 1                    | 2 | 3 | 4 | 5 |  |                   |
| 10. I needed to learn a lot of things before I could get going with [NAME OF STRATEGY]                | 1                    | 2 | 3 | 4 | 5 |  |                   |

Adapted from the System Usability Scale:

Brooke, J. (1996). SUS-A quick and dirty usability scale. *Usability evaluation in industry*, 189(194), 4-7.
